# Supplementary material
Source: PubMed Central journal article supplement (PMC6830764)
Supplement: supplementary_table_1.pdf [file supplementary_table_1.pdf]

**Supplementary Table 1.** NLRP3 Transcript Variants with size (total and 3'UTR) and seed sequence of has-miR-223-3p.

| <b>Transcript variant</b> | <b>NCBI ID</b> | <b>mRNA Bp</b> | <b>3'UTR bp</b> | <b>Seed sequence</b> | <b>Seed sequence nucleotide position</b> |
|---------------------------|----------------|----------------|-----------------|----------------------|------------------------------------------|
| 1                         | NM_004895      | 4470           | 613             | AACTGAC              | 4263 - 4269                              |
| 2                         | NM_183395      | 4128           | 613             | AACTGAC              | 3921 - 3927                              |
| 3                         | NM_001079821   | 3862           | 613             | AACTGAC              | 3655 - 3661                              |
| 4                         | NM_001127461   | 4333           | 613             | AACTGAC              | 4126 - 4132                              |
| 5                         | NM_001127462   | 4299           | 613             | AACTGAC              | 4092 - 4098                              |
| 6                         | NM_001243133   | 4470           | 613             | AACTGAC              | 4263 - 4269                              |
