# Supplementary material
Source: PubMed Central journal article supplement (PMC6830764)
Supplement: supplementary_table_2.pdf [file supplementary_table_2.pdf]

**Supplementary Table 2.** Luciferase activity and ratio calculation.

| <b>Luciferase activity (RLU)</b>        |                               |                            |                        |                                 |
|-----------------------------------------|-------------------------------|----------------------------|------------------------|---------------------------------|
|                                         | <b>Control vector<br/>(C)</b> | <b>NLRP3-3'UTR<br/>(T)</b> | <b>Ratio<br/>(C/T)</b> | <b>Mean <math>\pm</math> SD</b> |
| <i>H. pylori</i>                        | 6178                          | 1369                       | 4.51                   | 4.43 $\pm$ 0.16                 |
|                                         | 5839                          | 1373                       | 4.25                   |                                 |
|                                         | 5460                          | 1205                       | 4.53                   |                                 |
| <i>H. pylori</i> + miR-223-3p Inhibitor | 6308                          | 1262                       | 5.00                   | 5.02 $\pm$ 0.08                 |
|                                         | 6084                          | 1230                       | 4.95                   |                                 |
|                                         | 6665                          | 1306                       | 5.10                   |                                 |
| <i>H. pylori</i> + miR-223-3p Mimic     | 2087                          | 734                        | 2.84                   | 2.77 $\pm$ 0.07                 |
|                                         | 2130                          | 768                        | 2.77                   |                                 |
|                                         | 2089                          | 775                        | 2.70                   |                                 |
